# Supplementary material for: Excessive Treadmill Training Produces different Cardiac-related MicroRNA Profiles in the Left and Right Ventricles in Mice
Source: PubMed Central journal article supplement — Int J Sports Med. 2021 Aug 20;43(3):219–29. doi: 10.1055/a-1539-6702 (PMC8885328; doi:10.1055/a-1539-6702), 2021-08-20
Supplement: 10-1055-a-1539-6702-8436-0001.pdf [file 10-1055-a-1539-6702-8436-0001.pdf]

## Supplementary Material

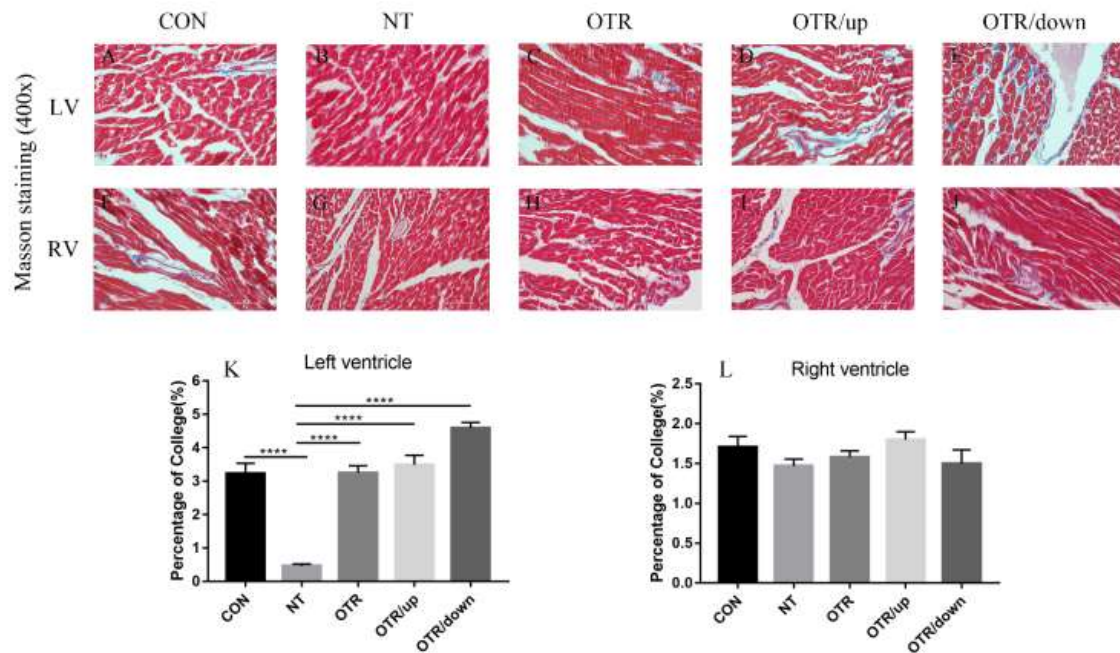

**Figure S1:** Representative images with the tissue sections with the Masson staining (400x) of left ventricular myocardium (A–E) and right ventricular myocardium (F–J) from five experimental groups. Scale bars represent 50  $\mu$ m. Quantitative analysis of Masson staining fibrosis results of left ventricular myocardium in five experimental groups (K). Quantitative analysis of Masson staining fibrosis results of right ventricular myocardium in five experimental groups (L). The data represent the means  $\pm$  SEMs. \*\*\*\* statistically significant ( $P < 0.0001$ ).
